# Supplementary material for: Rh2E2, a novel metabolic suppressor, specifically inhibits energy-based metabolism of tumor cells
Source: PubMed Central journal article supplement (PMC4891092; doi:10.18632/oncotarget.6934), 2016-01-18
Supplement: oncotarget-07-09907-s001.pdf [file oncotarget-07-09907-s001.pdf]

## SUPPLEMENTARY EXPERIMENTAL PROCEDURES

### IDENTIFICATION OF RH2E2

3-O- $\beta$ -D-glucopyranosyl 20*R*,24*S*-epoxydammarane-3 $\beta$ ,12 $\beta$ -triol, and its 24*R* epimer: White amorphous powder, optical rotation  $[\alpha]_D^{20} +5.29$  ( $C = 0.32$ , MeOH). High Resolution-ESI-MS (Positive ion mode):  $m/z$  639.4480  $[M+H]^+$  (calculated for  $C_{36}H_{63}O_9$ : 639.4467).  $^1H$ -NMR (400 MHz,  $C_5D_5N$ )  $\delta$ : 5.04 (2H, d,  $J = 7.8$  Hz, H-1'), 4.61 (2H, d,  $J = 11.4$  Hz, H-6'a), 4.42 (2H, dd,  $J = 11.4, 5.5$  Hz, H-6'b), 4.39 (2H, m, H-3'), 4.23 (2H, m, H-4'), 4.20 (2H, m, H-2'), 4.15 (2H, m, H-5'), 4.12 (2H, m, H-24), 3.88 (2H, m, H-12), 3.48 (2H, dd,  $J = 11.7, 4.3$ , H-3), 1.61, 1.60 (3H each, s, H-27), 1.58, 1.56 (3H each, s, H-21), 1.41, 1.40 (3H each, s, H-26), 1.40, 1.39 (3H each, s, H-18), 1.10 (6H, s, H-28), 1.08, 1.07 (3H each, s, H-30), 1.06, 1.00 (3H each, s, H-19), 0.90 (6H, s, H-29).  $^{13}C$ -NMR (100 MHz,  $C_5D_5N$ )  $\delta$ : 39.7 (C-1), 27.2 (C-2), 89.3 (C-3), 40.2 (C-4), 56.9 (C-5), 19.0 (C-6), 35.8 (C-7), 40.6 (C-8), 50.8 and 50.7 (C-9), 37.6 (C-10), 32.0 and 31.9 (C-11), 71.3 (C-12), 50.2 and 50.1 (C-13), 52.2 and 52.1 (C-14), 32.1 (C-15, 24*S*-epimer), 31.7 (C-15, 24*R*-epimer), 27.3 (C-16, 24*S*-epimer), 27.0 (C-16, 24*R*-epimer), 51.4 and 51.3 (C-17), 17.0 and 16.9 (C-18), 16.3 and 16.2 (C-19), 86.8 and 86.7 (C-20), 21.9 (C-21, 24*R*-epimer), 19.6 (C-21, 24*S*-epimer), 39.8 (C-22, 24*R*-epimer), 38.7 (C-22, 24*S*-epimer), 27.5 and 27.4 (C-23), 87.6 (C-24, 24*S*-epimer) 86.4 (C-24, 24*R*-epimer), 71.1 (C-25, 24*S*-epimer), 70.7 (C-25, 24*R*-epimer), 26.6 and 26.5 (C-26), 28.0 (C-27, 24*R*-epimer), 27.6 (C-27, 24*S*-epimer), 28.7 (C-28), 17.4 (C-29), 17.7 and 17.6 (C-30), 107.4 (C-1'), 76.3 (C-2'), 79.3 (C-3'), 72.4 (C-4'), 78.9 (C-5'), 63.6 (C-6'). In addition,  $^1H$ -NMR spectrum showed an anomeric proton at  $\delta$  5.04 (d,  $J = 7.8$  Hz), three oxygenated methane proton signals at  $\delta$  4.12 (m), 3.88 (m) and 3.48 (dd,  $J = 11.7, 4.3$ ), and sixteen quaternary methyl groups at  $\delta$  1.61, 1.60, 1.58, 1.56, 1.41, 1.40 (6H), 1.39, 1.10 (6H), 1.08, 1.07, 1.06, 1.00, 0.90 (6H). Furthermore,  $^{13}C$ -NMR spectrum revealed that some signals are in pair indicating the existence of a pair of epimers. The carbon signals at  $\delta$  107.4 (C-1'), 76.3 (C-2'), 79.3 (C-3'), 72.4 (C-4'), 78.9 (C-5'), 63.6 (C-6') were assigned to the  $\beta$ -glucopyranosyl moiety of Rh2E2. The other carbon signals were almost identical to those of 20*R*, 24*S*-epoxy-dammarane-3 $\beta$ -12 $\beta$ , 25-triol and its 24*R*-epimer by comparison with the literature data. The downfield shift of C-3 at  $\delta$  89.3 suggested that the glucosyl moiety is attached to C-3 of the aglycone.

### Immunoprecipitation assay

PBS-washed cells were lysed with ice-cold IP buffer containing protease inhibitor using syringe, then incubated on ice for 30 min. After centrifugation at 20,000 g for 20

min at 4°C and the supernatant was collected. 200  $\mu$ g proteins were pre-cleared by incubating with bead slurry with gentle agitation. After that, equal amounts of lysate proteins were incubated with protein A/G-agarose and desired primary antibody at 4°C for overnight with gentle rotation. Pulled down immune complexes with protein A/G-agarose were boiled and subjected to electrophoresis followed by immune-blotting.

### AOM/DSS colorectal cancer model

Male Balb/c mice (4-week-old) were purchased from Charles River Laboratory (Horsham, PA, USA), and maintained in the Animal Care Facility of Rutgers University. Housing and care of the animals were in accordance with the guidelines established by the University's Animal Research Committee consistent with the NIH Guidelines for the Care and Use of Laboratory Animals. Mice were fed with AIN-93M diet (Research diet, NJ, USA) and kept in an air-conditioned room with controlled temperature, humidity and 12 h day/night cycle. Body weight, food, and drink consumptions were monitored every other day during the experiment. An azoxymethane (AOM)/ dextran sodium sulfate (DSS)-induced colitis-associated colon carcinogenesis model was adopted to evaluate the chemopreventive of Rh2E2. Briefly, at week 2, 5-week-old Balb/c mice were subcutaneously injected with AOM (10 mg/kg, Sigma). After 1 week, 2% DSS (molecular weight: 36000 - 50000, MP Biomedicals, Santa Ana, CA, USA) was administered in the drinking water for 7 days followed by 14 days of tap water for recovery, and this cycle was repeated twice. Rh2E2 (20, 40 or 80 mg/kg) or the vehicle (PEG400: Ethanol: water = 6:1:3, v/v) was administered by gavage feeding at 0.1 mL per 20 g every other day from the first DSS cycle and throughout the experiment. The positive control drug, aspirin (50 mg/kg) was administered the same way starting a week before AOM injection throughout the experiment. At week 13, the mice were sacrificed by CO<sub>2</sub> asphyxiation and the colons (from the ileocecal junction to the anal verge) were removed for imaging capture and tumor assessment. After the measurement of weight and length, the colons were cut open longitudinally along the main axis, washed with phosphate-buffered saline and then inspected. Number, size, and location of tumors in the colons were documented based on the gross examination.

### LLC-1 Xenograft mouse models

Male C57BL/6J mice at the age of 6–8 weeks were obtained from the Chinese University of Hong

Kong, Hong Kong, China. Animal care and treatment procedures are conformed to the Institutional Guidelines and Animal Ordinance (Department of Health, HKSAR). Mice were randomly divided into vehicle control, Rh2E2 treatment and other control treatment groups,  $n = 11-13$ . The mice from all groups were subcutaneously injected with  $2 \times 10^6$  of mouse Lewis lung carcinoma cells (LLC-1) to the right dorsal region. Rh2E2 was dissolved in PEG400:ethanol:saline (60% : 10% : 30%, v/v/v), and given by intraperitoneal injection at doses of 1, 5 and 10 mg/kg or administrated by oral feeding at doses of 10, 20, 40 and 80 mg/kg for continuous 21 days. 20(S)-Rh2, 20(R)-Rh2, 20(S)-Rg3 and 5-Fu were adopted as control drugs. In order to make sure all groups were appropriate blinded, all the experimental procedures such as subcutaneous tumor cells injection, treatment and tumor size measurement were performed by three individual persons who were blinded for animal group identity. Body weight and tumor volume (length  $\times$  width<sup>2</sup>  $\times$  0.52) were measured every day. After 21-day treatment course, all mice were scarified and the dissected tumors were weighted and subjected to immunohistochemical analysis.

### Immunohistochemistry

The dissected lung or tumor tissues were fixed and then processed into paraffin blocks for sectioning at 7- $\mu$ m. Mounted tissue sections were deparaffinized in xylene, and subsequently rehydrated in graded ethanol and ddH<sub>2</sub>O. Tissue sections were then treated with 20  $\mu$ g/ml of Proteinase K (Roche Diagnostics, Mannheim, Germany), followed by 3% of hydrogen peroxide to block the endogenous peroxidase activity. After serum blocking, sections were incubated with antibodies such as anti-PCNA, anti- $\alpha$ -enolase or anti-stathmin for 1 h or suggested to POD activity assay kit according to manufacturing instruction (Roche Diagnostics), followed by 10 min incubation with *SuperPicture*<sup>TM</sup> HRP Polymer conjugate (ZYMED Lab., Invitrogen, Carlsbad, CA). After washing, slides were incubated in DAB substrate solution until the desired stain intensity was developed. The slides were then counterstained with hematoxylin, dehydrated and mounted. For necrosis detection, tumor tissue sections were stained by hematoxylin and eosin. Quantification of protein expression signal (brown colour) was counted by the total number of cells with brown immunostaining. Immunostaining images were captured by Leica DM2500 microscope.

### Proteomic analysis of LLC-1 tumor tissues and cells

50 mg of frozen mouse tumor tissues were extracted using TissueLyser LT (QIAGEN, Hilden, Germany) with

metal bead for 2 min at 50 Hz with urea/thiourea lysis buffer (1:10 w/v). For cell lines, the cell pellets were successively washed with ice-cold PBS and TBSS for three times and resuspended in 500  $\mu$ L of urea/thiourea lysis buffer [7 M urea, 2 M thiourea, 4% (w/v) CHAPS, 30 mM Tris/HCl and protease inhibitor, pH 9.0, (GE healthcare)]. The lysates were incubated on ice for 5 min and centrifuged at 17000 g at 4°C for 1 hr. The supernatants were processed with 2-D Clean Up kit and re-suspended in the urea/thiourea lysis buffer for 2D-DIGE or in Dissolution buffer containing 5% SDS provided in iTRAQ Reagent 4-Plex kit (AB SCIEX) for iTRAQ experiment. The protein concentration was determined by 2-D Quant Kit and adjusted to 5  $\mu$ g/ $\mu$ L.

For 2-DE method, 100  $\mu$ g proteins were made up to 250  $\mu$ L with the rehydration buffer (8 M urea, 2% (w/v) CHAPS, 0.5% (v/v) of pH 3–10 NL IPG buffer (GE Healthcare)) contained 60 mM DTT and applied to IPG strips (pH 3–10 NL, 13 cm) (GE Healthcare). The voltage hours of IEF strips were focused for approximately 60000 Vhr. The focusing IPG strips were immediately equilibrated in SDS equilibration buffer [6 M urea, 75 mM Tris-HCl (pH 8.8), 30% glycerol (v/v), 2% SDS (w/v), 0.002% (w/v) bromophenol blue] containing 10 mg/mL DTT for 15 min, and thereafter in the SDS equilibration buffer containing 25 mg/mL IAA for 15 min. After 2-DE separation, the gels were fixed for over 30 min in 40% ethanol and 10% acetic acid and stained using silver stain kit (GE Healthcare). The stained gels were then scanned with an Image Scanner III (GE Healthcare, Chalfont St. Giles, UK) and images of the spots were automatically analyzed using 2-D Elite ImageMaster Software (GE Healthcare). Experiments were performed in triplicate. Nine image gels for each group were matched. Each matched spot was numbered, and the spot volumes were normalized by total spot volume. Differences between matched spots in two groups were analyzed by Student's *t*-test, and considered significant at *p*-values < 0.05. Results were expressed as change (n-fold) calculated using the ratio between the highest and lowest average spot volume between Rh2E2-treated and non-treated cells.

For 2D-DIGE method, the pH of tumor tissue samples was adjusted to pH 8.5. Samples were aliquoted at 50  $\mu$ g, and the pooled internal standard was made with 25  $\mu$ g of each of the 12 test samples combined. Each protein samples were fluorescence labelled by incubation with 400 pmol (in 1  $\mu$ L of anhydrous DMF) of CyDye (Cy3, Cy5, or Cy2) on ice for 30 min. The samples were then combined for each gel and successively incubated with 10 mM DTT and 40 mM IAA for 1 hr on ice for proper reduction and alkylation. The mixtures were made up to 450  $\mu$ L with rehydration buffer and applied to Immobililine DryStrip gels (IPG strips; pH 3–10 NL, 24 cm) (GE Healthcare) by in-gel rehydration for 16 hr at

room temperature in an immobiline DryStrip Reswelling Tray (GE Healthcare). The IPG strips were transferred to an Ettan IPGphor II Manifold (GE Healthcare). IEF strips were focused for 50000 Vhr. After electrophoresis, gels were scanned directly between the glass plates using a Typhoon 9400 (GE Healthcare) laser scanner according to the manufacturer's recommendations as described before [Analytical Biochemistry Volume 443, Issue 1, 1 December 2013, Pages 27–33], variable mode imager at each of the appropriate CyDye excitation wavelengths (Cy3 (532 nm), Cy5 (633 nm), Cy2 (488 nm)). Image analysis was carried out with DeCyder differential analysis software 7.0 (GE Healthcare). Multiplexed analysis was selected for DIGE experiments and a representative reference gel image was selected for MALDI-TOF/TOF analysis

For iTRAQ labelling, the sample labelling was carried out using iTRAQ Reagent 4-Plex kit (AB SCIEX) based on the manufacturer's protocol. Briefly, the lysates were reduced and alkylated, then suggested to trypsin digestion with protein ratio of 1:10 (w/w) at 37°C for 16 hr. Six vials of iTRAQ reagent 116 was used to label mice tumor control sample while 6 vials of iTRAQ reagent 117 labeled mice tumor tissue sample with Rh2E2 treatment (iTRAQ pairs were always chosen between 114/115 or 116/117 to avoid isotopic correction during data analysis). The labelled digested peptides were incubated at room temperature for 2 hr. Subsequently, both samples were combined and taken up to a total of 1 mL with 0.1% TFA prior to cleanup on Sep-Pak C18. After isoelectric focusing, peptides from IPG strip fractions were extracted with a gradient solution (sequential extractions with 0.1% TFA, 50% ACN/0.1%TFA and 100% ACN/0.1% TFA), with gentle shaking for 1 hr each at room temperature. The eluate was then vacuum dried and cleaned up by using Waters 1 cc/10 mg OASIS HLB cartridge and eluted with 70% ACN/0.1% TFA twice. Eluates were dried under vacuum and reconstituted in 25 µL of 2% ACN/0.1% TFA before 1D-LC-MS/MS analysis. Approximately 0.2 µg of peptides were subjected to automated LC-MS/MS analysis, using Dionex Ultimate 3000 RSLC system coupled on-line to Bruker maXis Impact Q-TOF MS.

For database search and bioinformatics analysis, MS/MS data was processed using Bruker Compass Data Analysis software, and the generated peaklists were submitted to MASCOT search engine against SwissProt 51.6 database. Search parameters were defined as digestion with trypsin, fixed modification of methylthiolation at cysteine, variable modification of N-terminal acetylation of protein, conversion of N-terminal glutamine to pyro-glutamate, oxidation of methionine, and iTRAQ labeling at lysine residue and N-terminus of peptides. One missed cleavage, mass accuracy of 6 ppm on the parent ion, and 0.6 Da on

fragment ions were allowed. The peptides with weight value higher than 0.5 and intensity of reporter ion higher than 20 were considered for protein quantification. The median value of ion ratios was calculated as protein ratio.

### LC-MS/MS measurement of ATP metabolites

LLC-1 cells were harvested in 12 mL of ice-cold phosphate buffered saline (PBS). The cell pellet was then treated with 150 µL of 15% trichloroacetic acid (TCA) containing 7.5 µL of 20.0 µM ATP13C, 15N as internal standard and placed on ice for 10 minutes. After centrifugation at 13,500 rpm for 15 min, the acidic supernatant was separated and neutralized twice with 80 µL mixture of triethylamine and 1, 1, 2-trichlorotrifluoroethane (a volume ratio of 45 to 55). Samples were ready for LC-MS/MS analysis. A Thermo Fisher TSQ LC-MS/MS system consisted of an Accela Autosampler, an Accela pump and a Quantum Access triple quadrupole mass spectrometer. Data acquisition was performed with the Xcalibur software version 2.0.7, and data processing was carried out using the Thermo LCQuan 2.5.6 data analysis program. The chromatographic separation was achieved on a XTerra-MS C18 column (150 mm × 2.1 mm i.d., 3.5 µm, Waters, Milford, MA). The two eluents were: (A) 5 mM HA–0.5% DEA in water, pH adjusted to 10 with acetic acid; and (B) 50% acetonitrile in water. The mobile phase consisted of linear gradients of A and B: 0–15 min, 100–80% A (v/v); 15–35 min, 80–70% A; 35–45 min, 70–45% A; 45–46 min, 45–0% A; 46–50 min, 0–0% A; 51–70 min, 100–100% A. The liquid flow-rate was set at 0.3 mL/min, and the column temperature was maintained at 35 °C.

### Cell invasion assay

The cancer cell invasion assay was performed in a Cell Invasion Chamber, a 24-well tissue culture plate with cell culture inserts that contain an 8 µm pore size polycarbonate membrane over a thin layer of dried ECMatrix™ (CHEMICON). H1299 cells (15000 cells/well) were re-suspended in serum-free medium and incubated in an invasion chamber insert with different concentrations of Rh2E2 for 72 h, while the lower chamber contained medium with 10% FBS. The cells invaded through the ECM layer to the bottom of the polycarbonate membrane were labeled with Cell Stain provided in the kit for 20 min at room temperature. The non-invading cells were gently removed from the interior of the inserts by using a cotton-tipped swab. The number of invaded cells was counted through the microscope and quantified by dissolving stained cells in 10% acetic acid (200 µL/well). The colorimetric reading of the solute mixture was determined by spectrophotometer at OD 560 nm.

### Acetyl-CoA assay

LLC-1 cells were treated with 80  $\mu$ M Rh2E2 for 24 h. The cell lysates were then harvested for determination of acetyl-coenzyme A (Acetyl-CoA) by Acetyl-CoA Assay Kit (Sigma, MO, USA) following manufacturer's instruction. In brief,  $2 \times 10^6$  Rh2E2-treated LLC-1 cancer cells were homogenized and deproteinized with 2  $\mu$ L of 1 N perchloric acid/mg of sample on ice. The cell lysates were centrifuged at  $13,000 \times g$  for 10 minutes to remove insoluble material. The supernatant was then neutralized with 3 M potassium bicarbonate solution, adding in aliquots of 1  $\mu$ L/10  $\mu$ L of supernatant while vortexing until bubble evolution ceases. The samples were cool on ice for 5 minutes and then mcentrifuged to pellet potassium bicarbonate. Bring samples to a final volume of 50  $\mu$ L with Acetyl-CoA Assay Buffer, mixed and incubated the reaction in the well for 10 minutes at 37°C at dark. After incubation, the absorbance of fluorescence intensity ( $\lambda_{ex} = 535/\lambda_{em} = 587$  nm) was detected by the TECAN plate reader and the concentration of Acetyl-CoA was calculated based on the standard curve. The calculation formula is as follow,

$$\text{Concentration} = S_a/S_v$$

$S_a$  = Amount of Acetyl-CoA in unknown sample (pmole) from standard curve

$S_v$  = Sample volume added into the wells

### $\alpha$ -Ketoglutarate assay

LLC-1 cancer cells treated with or without 80  $\mu$ M of Rh2E2 were harvested for determination of  $\alpha$ -Ketoglutarate ( $\alpha$ -KG) by  $\alpha$ -KG Assay Kit (Sigma, MO, USA) following manufacturer's instruction. In brief,  $2 \times 10^6$  LLC-1 cells were homogenized and deproteinized with 10kDa MWCO spin filter. The cell lysates were then mixed with  $\alpha$ -KG assay reagent and incubated in 96 well plate for 30 minutes at 37°C. After that, the mixture absorbance at 570 nm ( $A_{570}$ ) was detected by the TECAN plate reader and the concentration of  $\alpha$ -KG was calculated based on the standard curve. The calculation formula is as follow,

$$\text{Concentration} = S_a / S_v,$$

$S_a$  = amount of  $\alpha$ -KG in unknown sample from standard curve

$S_v$  = sample volume added into the wells

## SUPPLEMENTARY FIGURES AND TABLES

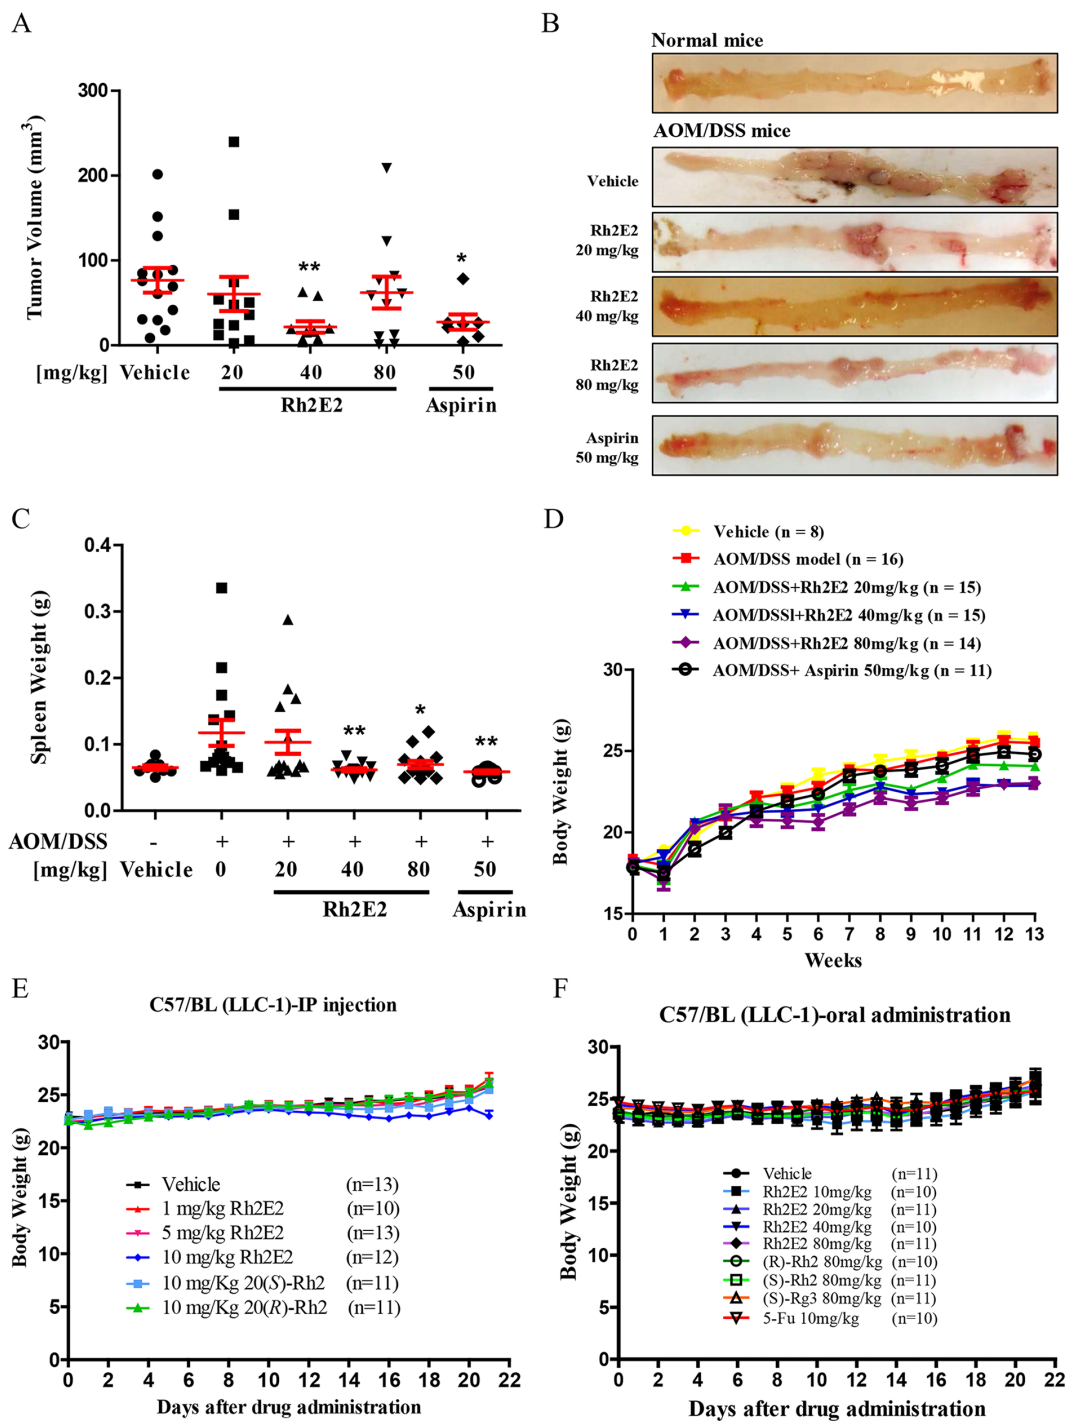

**Supplementary Figure S1: *In vivo* anti-tumor effect of Rh2E2 on colitis-associated colon carcinogenesis and LLC-1 xenograft model.** **A.** Effect of Rh2E2 on the tumor volume of neoplasms found in mice colon. After the drug treatment, the colon were dissected longitudinally and the volume of tumor in length (mm)  $\times$  width (mm)  $\times$  height (mm) were measured by caliper. Data were presented as mean  $\pm$  SEM, \* $P$  < 0.05, \*\* $P$  < 0.01, versus AOM/DSS vehicle control group. **B.** Macroscopic view of colon in mice. Colorectal neoplasms were frequently observed in the middle and distal colon. **C.** Effect of Rh2E2 on spleen weight of AOM/DSS mice. After the mice were sacrificed, spleens were removed and weighted. Data were shown as mean  $\pm$  SEM, \* $P$  < 0.05, \*\* $P$  < 0.01, versus AOM/DSS group. **D.** Effect of Rh2E2 on body weight of AOM/DSS mice. All mice body weight was recorded on the first day of each week for a total of 13 weeks. Data were expressed as mean  $\pm$  SEM. **E.** Body weight change of mice with intraperitoneal injection of Rh2E2. **F.** Body weight change of mice with oral administration of Rh2E2.

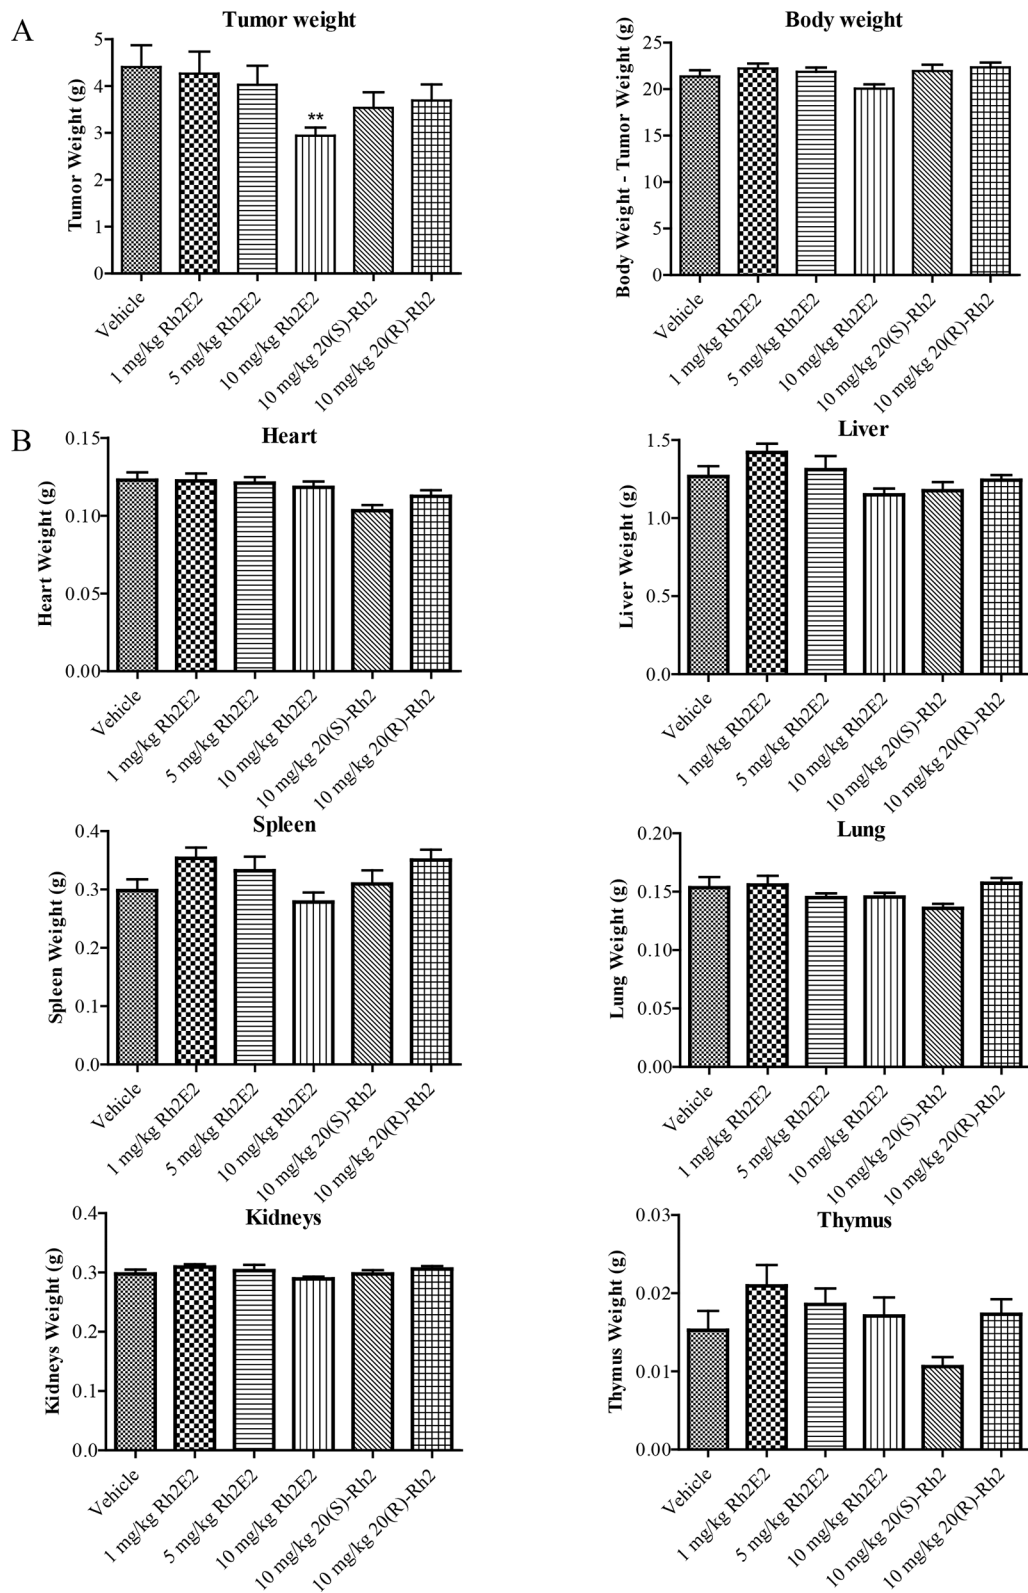

**Supplementary Figure S2: The tumor suppression effect of Rh2E2 in LLC-1 xenograft model via ip injection. A.** The tumor weight and body weight change of mice after Rh2E2 treatment. **B.** The organs weight change of mice after Rh2E2 treatment.

A

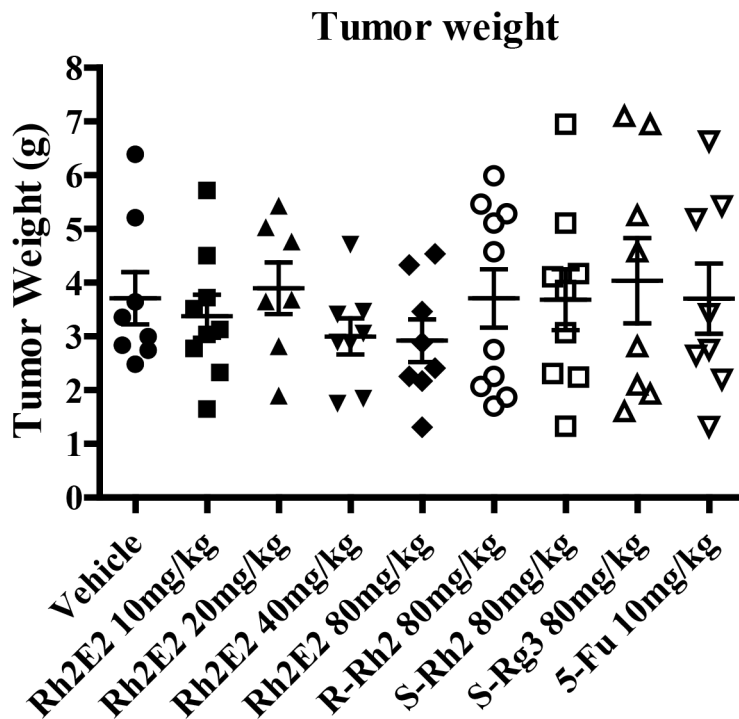

B

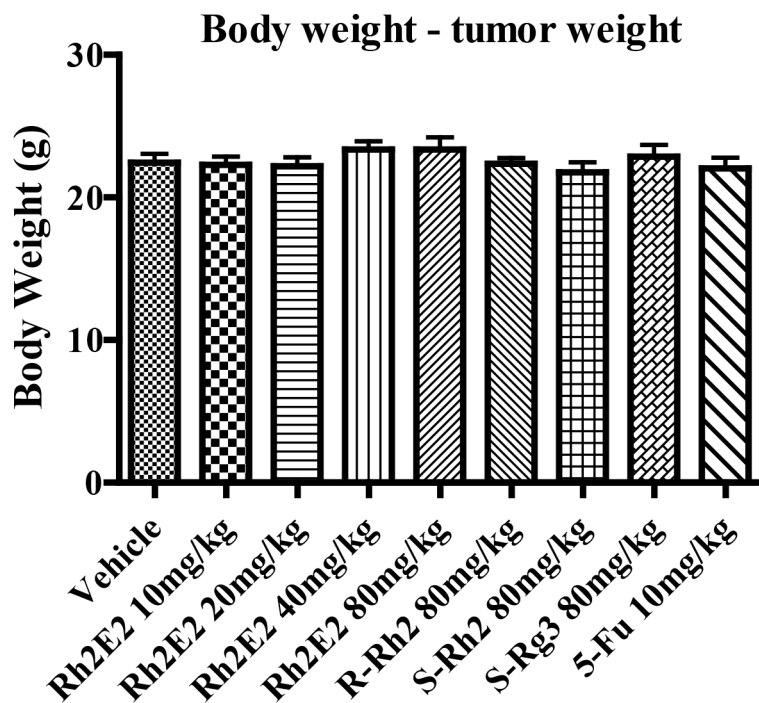

**Supplementary Figure S3: The tumor suppression effect of Rh2E2 in LLC-1 xenograft model via oral administration.**  
 A. The tumor weight change of mice after Rh2E2 treatment. B. The body weight change of mice after Rh2E2 treatment.

A

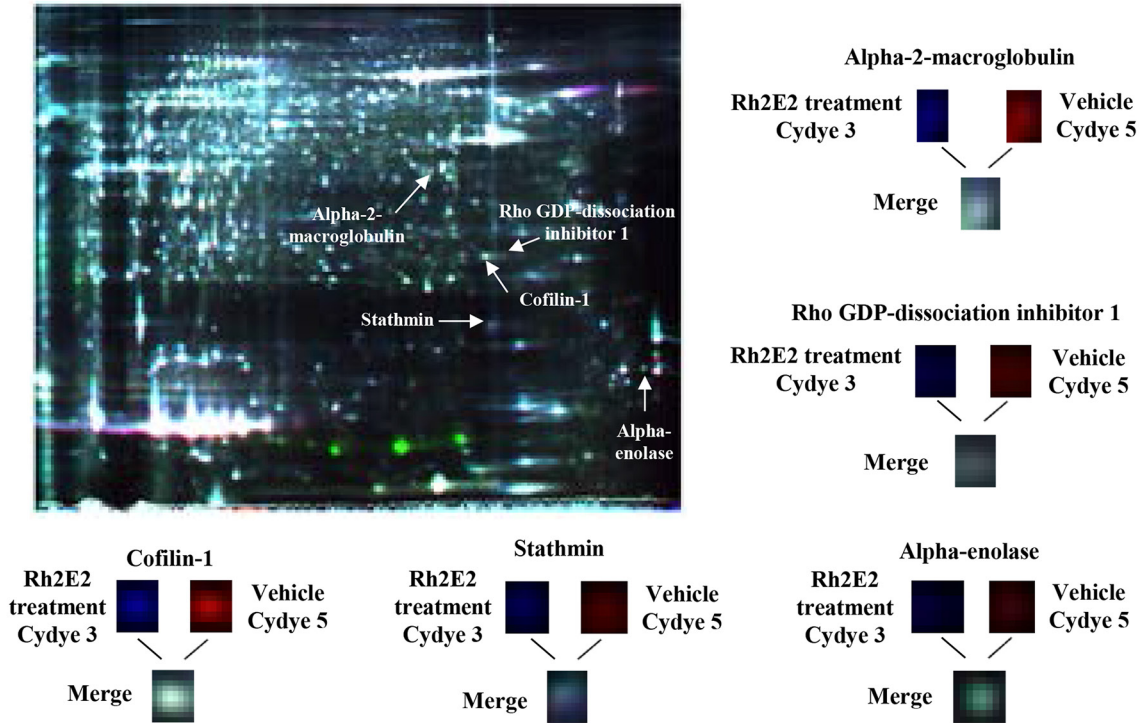

B

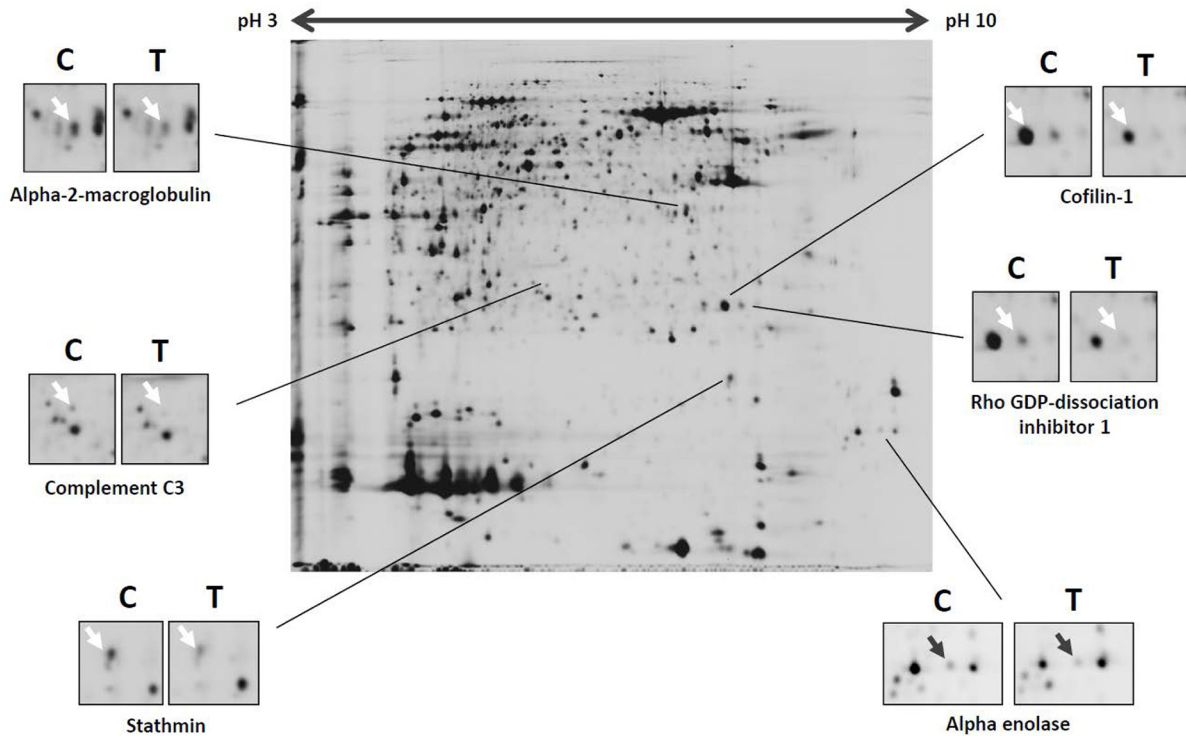

**Supplementary Figure S4: Proteomic analysis of tumor tissues from vehicle control or Rh2E2-treated LLC-1 xenograft.** A. Differentially expressed proteins including  $\alpha$ -2-macroglobulin, Rho GDP-dissociation inhibitor 1, cofilin-1, stathmin and  $\alpha$ -enolase were identified by 2D-DIGE. B. The differentially expressed protein spots were visualized in stained 2D-gel.



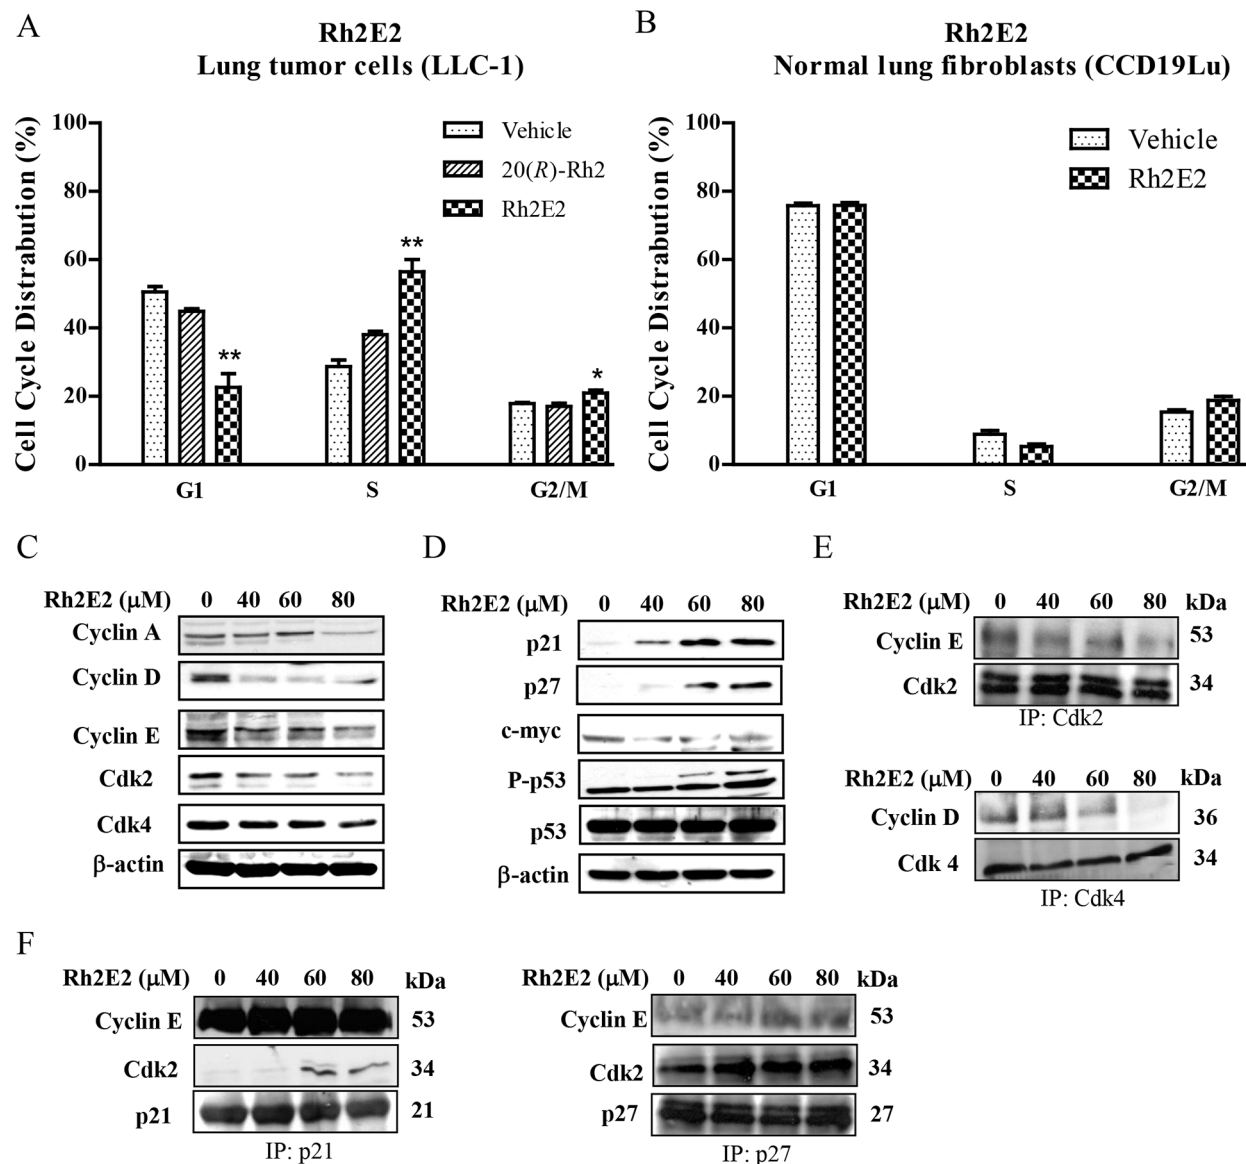

**Supplementary Figure S5: Rh2E2 induced S-phase cell cycle arrest through regulation of Cdk/Cyclins and Cdk inhibitors expression.** **A.** Effects of 20(R)-Rh2 and Rh2E2 on cell cycle progression in LLC-1 cancer cells. **B.** Effect of Rh2E2 on cell cycle progression in CCD19Lu normal lung cells. Exponentially growing LLC-1 or CCD19Lu cells were synchronized in the serum-free medium for 24 h. Then the cells were incubated with the DMSO, 80  $\mu$ M 20(R)-Rh2 or 80  $\mu$ M Rh2E2 for 48 hr. The cell cycle progression was evaluated using propidium iodide staining and flow cytometry analysis. The bar chart indicated the results of quantitative analysis of cell-cycle distribution (% of cell population). Means  $\pm$  S.E.M. were from three independent experiments (One-way ANOVA: \* $P < 0.05$ , \*\* $P < 0.01$ ). **C.** Effect of Rh2E2 on expression level of S phase specific cdk/cyclins. **D.** Effect of Rh2E2 on expression of cdk inhibitors during cell cycle progression. **E.** Rh2E2 inhibited the interaction between cyclin E/cdk2 and cyclin D/cdk4. The relative amount of cyclin E/D bound to cdk2/4 was normalized to its corresponding cdk2/4 levels. **F.** The interaction between p21 or p27 with cyclin E/cdk2 in response to Rh2E2 treatment. The relative amount of cyclin E/cdk2 bound to p21 or p27 was normalized to its corresponding p21 or p27 levels.

A

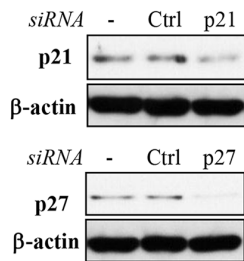

B

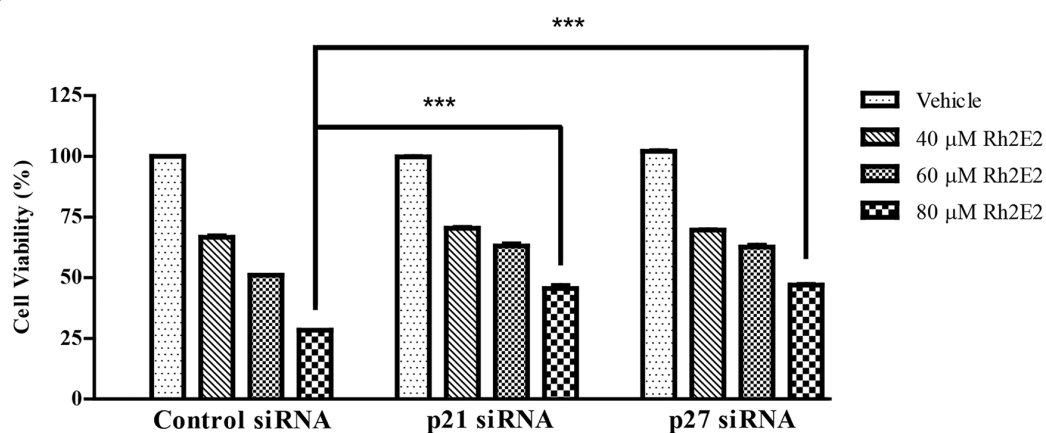

C

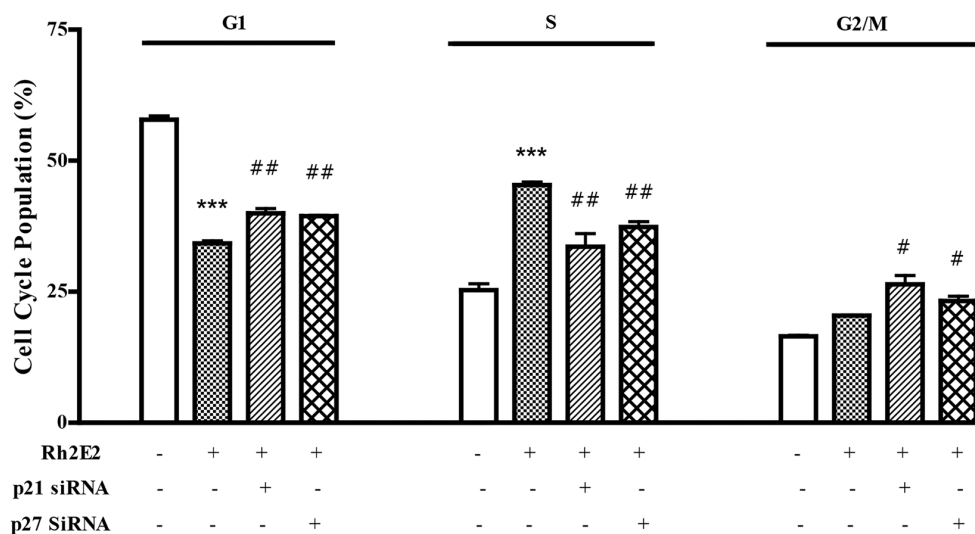

**Supplementary Figure S6: Rh2E2 induced S-phase cell cycle arrest and cell death via p21 and p27.** A. siRNA knockdown of p21 and p27 in LLC-1 cells. B. Rh2E2-mediated cell cytotoxicity was dependent on p21 and p27 expression. Cytotoxic effect of Rh2E2 in LLC-1 cells transfected with control nonspecific siRNA or p21- or p27-targeted siRNA. siRNA transfected cells were treated with DMSO (control) or Rh2E2 at indicated drug concentrations for 48 h and then subjected to MTT assay. Means  $\pm$  S.E.M. were from three independent experiments (One-way ANOVA: \*\*\* $P < 0.001$ ). C. Cell cycle progression of LLC-1 cells transfected with the control nonspecific siRNA or p21- or p27-targeted siRNA. siRNA transfected cells were treated with DMSO (control) or 80  $\mu$ M Rh2E2 for 48 h and then evaluated using propidium iodide and flow cytometry analysis. Means  $\pm$  S.E.M. were from three independent experiments ( $t$ -test: \*\*\* $P < 0.001$  comparing with non-transfected group; # $P < 0.05$ , ## $P < 0.01$  comparing with Rh2E2-treated group).

A

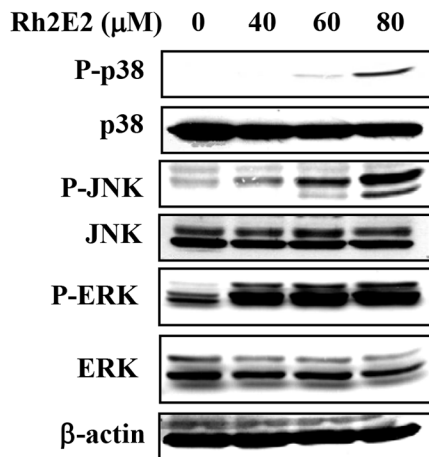

C

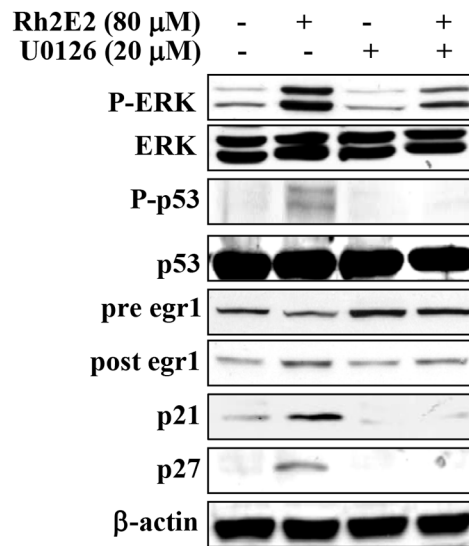

B

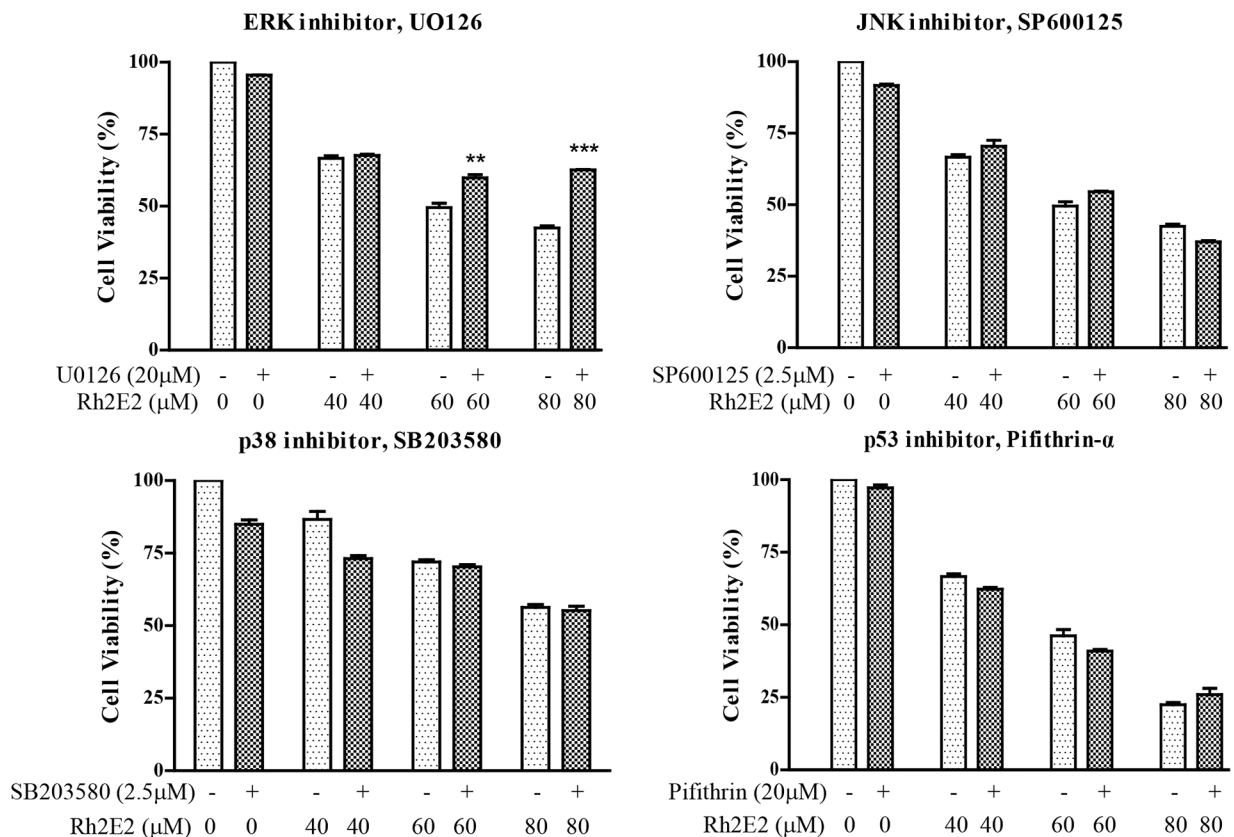

**Supplementary Figure S7: Effect of Rh2E2 on MAPK signalling pathways.** A. Rh2E2 activated MAPK signalling via phosphorylation of p38, p-JNK, and p-ERK. B. Rh2E2-mediated cell cytotoxicity through modification of MAPKs and p53 signalling. \*\* $P < 0.01$ , \*\*\* $P < 0.001$  comparing with MAPK inhibitor free Rh2E2-treatment group. C. Involvement of ERK/p53 and ERK/egr1 signalling in the Rh2E2-induced p21 and p27 expression.

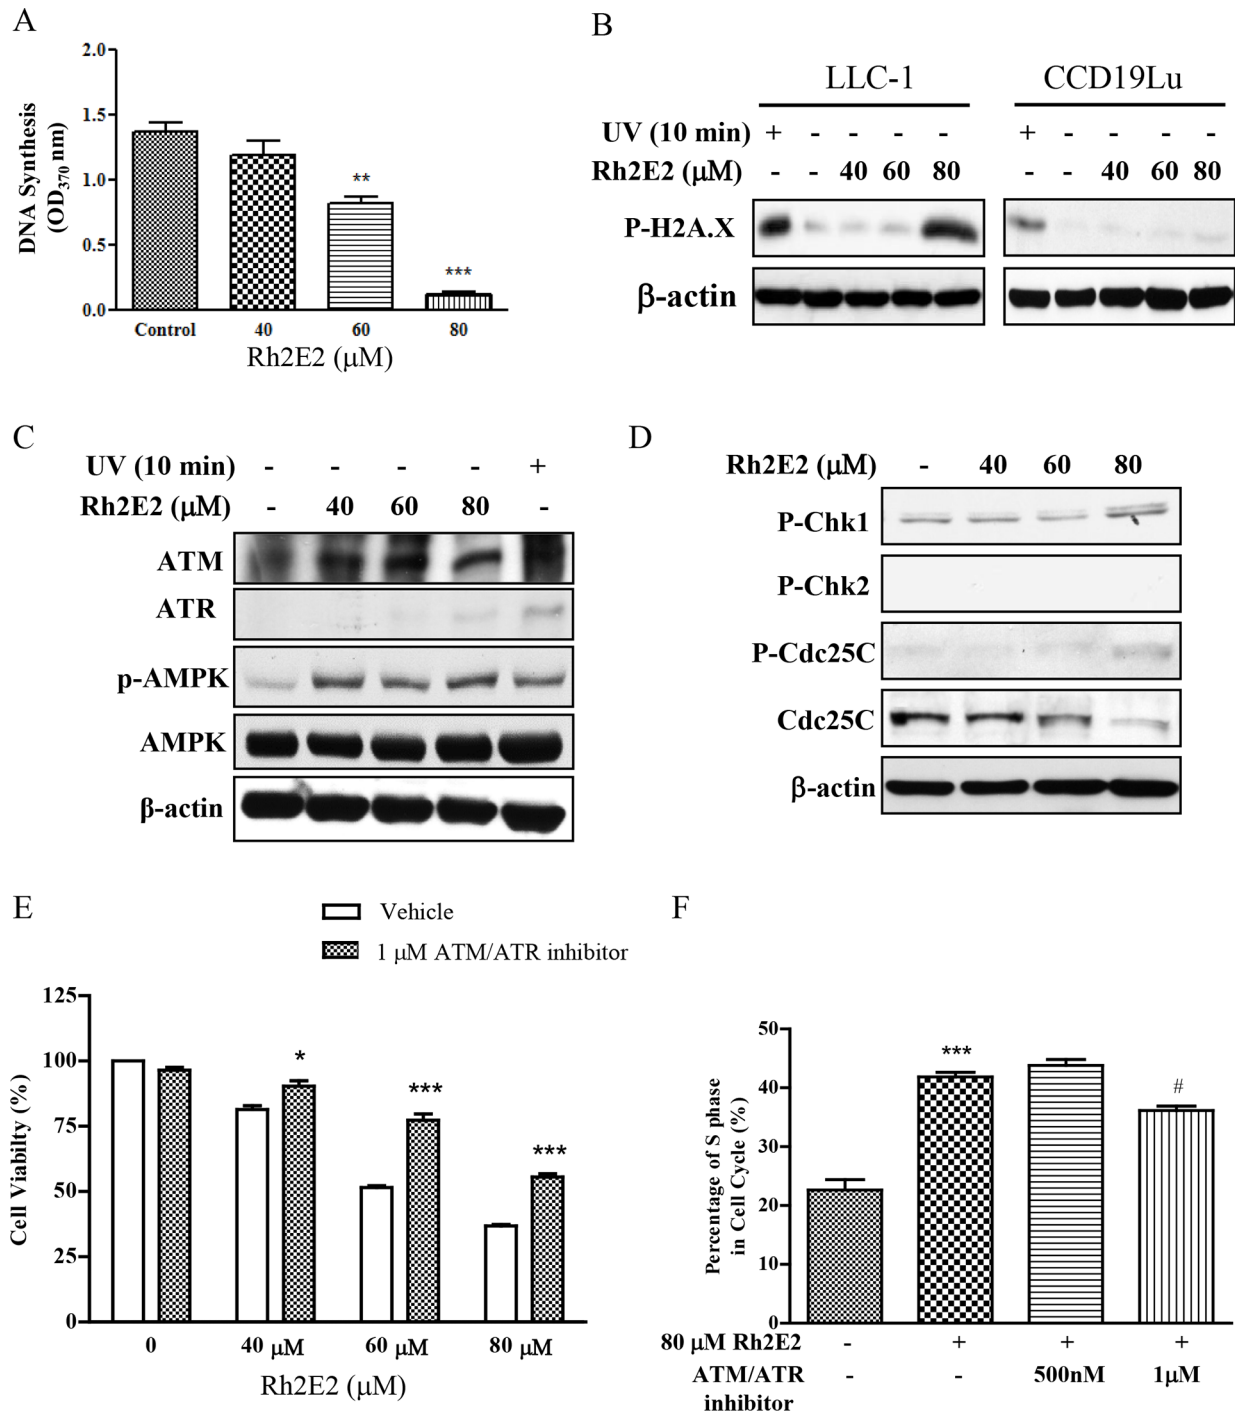

**Supplementary Figure S8: Effect of Rh2E2 on genotoxic stress and ATM/ATR signalling pathways activation.** **A.** Rh2E2 inhibited the DNA synthesis in LLC-1 cancer cells. The cells were grown in 96 well plates followed by treatment with indicated concentrations of Rh2E2 for 48 hr. The cells were then incubated with BrdU for 4 hr followed by incubation with anti-BrdU antibody and substrate by using ELISA reader. Data were presented as mean ± S.E.M. \*\**P* < 0.01 and \*\*\**P* < 0.001. **B.** Rh2E2 induced H2A.X (Ser139) phosphorylation in LLC-1 cancer cells but not normal cells. **C.** Rh2E2 activated the ATM and AMPK signalling pathways. **D.** Rh2E2 activated the Chk1/2-Cdc25C signalling pathway. LLC-1 cancer cells were treated with indicated concentrations of Rh2E2 for 48 hr. Protein was lysed and harvested with RIPA buffer. Cell lysates were separated by 10% SDS-PAGE, and then subjected to immunoblotting with antibodies against phospho-H2A.X, ATM, ATR, phospho-Chk1 (Ser345), phospho-Chk2 (Thr68), phospho-Cdc25C (Ser216) and total Cdc25C antibodies. Data were representative of three experiments. **E.** Rh2E2-mediated cell cytotoxicity was abolished by addition of ATM/ATR inhibitor. **F.** Rh2E2-mediated S-phase cell cycle arrest was partially reduced by addition of ATM/ATR inhibitor.

**Supplementary Table S1: 2D-DIGE detection of differentially expressed proteins from cancerous tissues of the vehicle- and Rh2E2-treated LLC-1 bearing mice**

| Prot_acc    | Protein name                                               | Fold change | T-test |
|-------------|------------------------------------------------------------|-------------|--------|
| RD23B_MOUSE | RAD23 homolog B                                            | 0.43        | 0.018  |
| APOA1_MOUSE | Apolipoprotein A-I precursor                               | 0.53        | 0.031  |
| CYB5_MOUSE  | Cytovillin                                                 | 0.53        | 0.049  |
| KNG1_MOUSE  | Bradykinin                                                 | 0.53        | 0.022  |
| ENOA_MOUSE  | Alpha-enolase                                              | 0.55        | 0.007  |
| PPIP1_MOUSE | Proline-serine-threonine phosphatase-interacting protein 1 | 0.55        | 0.017  |
| A1AT4_MOUSE | Alpha-1 protease inhibitor 4                               | 0.55        | 0.015  |
| HNRPM_MOUSE | Heterogeneous nuclear ribonucleoprotein M                  | 0.56        | 0.017  |
| HSP74_MOUSE | Heat shock 70 kDa protein 4                                | 0.562       | 0.018  |
| HSP7C_MOUSE | Heat shock cognate 71 kDa protein                          | 0.59        | 0.015  |
| CO3_MOUSE   | Complement C3                                              | 0.60        | 0.042  |
| TCPA2_MOUSE | T-complex protein 1 subunit alpha B                        | 0.60        | 0.021  |
| ROA2_MOUSE  | Heterogeneous nuclear ribonucleoproteins A2/B1             | 0.62        | 0.032  |
| TCPZ_MOUSE  | T-complex protein 1 subunit zeta                           | 0.63        | 0.024  |
| A2M_MOUSE   | Alpha-2-macroglobulin                                      | 0.65        | 0.049  |
| APOH_MOUSE  | Apolipoprotein H                                           | 0.66        | 0.020  |
| SOD2_MOUSE  | Superoxide dismutase                                       | 0.66        | 0.022  |
| DDAH2_MOUSE | Dimethylargininase-2                                       | 0.67        | 0.014  |
| FABP5_MOUSE | Fatty acid-binding protein                                 | 0.68        | 0.036  |
| HEMO_MOUSE  | Hemopexin precursor                                        | 0.70        | 0.033  |
| PRDX2_MOUSE | Peroxiredoxin-2                                            | 0.71        | 0.012  |
| STMN1_MOUSE | Stathmin                                                   | 0.71        | 0.043  |
| GALNS_MOUSE | N-acetylgalactosamine-6-sulfate sulfatase                  | 0.72        | 0.013  |
| CH3L3_MOUSE | Chitinase 3-like protein 3 precursor                       | 0.72        | 0.047  |
| GELS_MOUSE  | Gelsolin precursor                                         | 0.74        | 0.010  |
| ANXA1_MOUSE | Annexin A1                                                 | 0.74        | 0.025  |
| ATPB_MOUSE  | ATP synthase subunit beta, mitochondrial precursor         | 0.74        | 0.026  |
| PRDX1_MOUSE | Peroxiredoxin-1                                            | 0.77        | 0.043  |

(Continued)

| Prot_acc    | Protein name                             | Fold change | T-test |
|-------------|------------------------------------------|-------------|--------|
| TCPG_MOUSE  | T-complex protein 1 subunit gamma        | 0.77        | 0.010  |
| COF1_MOUSE  | Cofilin-1                                | 0.78        | 0.049  |
| NDRG1_MOUSE | Protein NDRG1                            | 0.78        | 0.041  |
| PER3_MOUSE  | Period circadian protein homolog 3       | 0.79        | 0.045  |
| ADK_MOUSE   | Adenosine kinase                         | 0.79        | 0.037  |
| GDIR_MOUSE  | Rho GDP-dissociation inhibitor 1         | 0.79        | 0.044  |
| ALDH2_MOUSE | Aldehyde dehydrogenase 2, mitochondrial  | 1.20        | 0.019  |
| LEG1_MOUSE  | Galectin-1                               | 1.22        | 0.028  |
| RS12_MOUSE  | 40S ribosomal protein S12                | 1.24        | 0.044  |
| PDCD5_MOUSE | Programmed cell death protein 5          | 1.25        | 0.039  |
| EF2_MOUSE   | Elongation factor 2                      | 1.33        | 0.010  |
| APT_MOUSE   | Adenine phosphoribosyltransferase        | 1.34        | 0.015  |
| ANXA5_MOUSE | Annexin A5                               | 1.35        | 0.033  |
| CALM_MOUSE  | Calmodulin                               | 1.40        | 0.035  |
| TKT_MOUSE   | Transketolase                            | 1.41        | 0.023  |
| CRAMP_MOUSE | Cathelin-related antimicrobial peptide   | 1.45        | 0.044  |
| TCTP_MOUSE  | Translationally-controlled tumor protein | 1.48        | 0.010  |
| TALDO_MOUSE | Transaldolase                            | 1.50        | 0.030  |
| EF1A1_MOUSE | Elongation factor 1-alpha 1              | 1.51        | 0.040  |
| RSSA_MOUSE  | 40S ribosomal protein SA                 | 1.86        | 0.043  |

**Supplementary Table S2: iTRAQ detection of differentially expressed proteins from the cancerous tissues of the vehicle- and Rh2E2-treated LLC-1 bearing mice**

| Prot_acc    | Prot_desc                                                 | Fold change |
|-------------|-----------------------------------------------------------|-------------|
| FOLR2_MOUSE | Folate receptor beta                                      | 0.35        |
| MYP0_MOUSE  | Myelin protein P0                                         | 0.35        |
| C163A_MOUSE | Scavenger receptor cysteine-rich type 1 protein           | 0.46        |
| AP4A_MOUSE  | Bis(5~nucleosyl)-tetrphosphatase                          | 0.46        |
| PLP2_MOUSE  | Proteolipid protein 2                                     | 0.47        |
| MYD88_MOUSE | Myeloid differentiation primary response protein          | 0.48        |
| ENAH_MOUSE  | Protein enabled homolog                                   | 0.48        |
| SF17B_MOUSE | Splicing factor, arginine/serine-rich 17B                 | 0.48        |
| RABP1_MOUSE | Cellular retinoic acid-binding protein 1                  | 0.49        |
| COCA1_MOUSE | Collagen alpha-1(XII) chain                               | 0.52        |
| SAMN1_MOUSE | SAM domain-containing protein SAMSN-1                     | 0.52        |
| CREL2_MOUSE | Cysteine-rich with EGF-like domain protein 2              | 0.52        |
| AN13A_MOUSE | Ankyrin repeat domain-containing protein 13A              | 0.55        |
| DHYS_MOUSE  | Deoxyhypusine synthase                                    | 0.56        |
| CF211_MOUSE | UPF0364 protein C6orf211 homolog                          | 0.56        |
| BORG3_MOUSE | Cdc42 effector protein 5                                  | 0.57        |
| TCF20_MOUSE | Transcription factor 20                                   | 0.58        |
| IBP3_MOUSE  | Insulin-like growth factor-binding protein 3              | 0.59        |
| ARP19_MOUSE | cAMP-regulated phosphoprotein 19                          | 0.60        |
| ECHD1_MOUSE | Enoyl-CoA hydratase domain-containing protein 1           | 0.60        |
| THAS_MOUSE  | Thromboxane-A synthase                                    | 0.60        |
| SPY4_MOUSE  | Protein sprouty homolog 4                                 | 0.60        |
| GGCT_MOUSE  | Gamma-glutamylcyclotransferase                            | 0.60        |
| TAGL_MOUSE  | Transgelin                                                | 0.60        |
| P4K2B_MOUSE | Phosphatidylinositol 4-kinase type 2-beta                 | 0.61        |
| PTMA_MOUSE  | Prothymosin alpha                                         | 0.61        |
| USF2_MOUSE  | Upstream stimulatory factor 2                             | 0.62        |
| GSDMC_MOUSE | Gasdermin-C                                               | 0.63        |
| SOSSC_MOUSE | SOSS complex subunit C                                    | 0.63        |
| E2AK4_MOUSE | Eukaryotic translation initiation factor 2-alpha kinase 4 | 0.64        |
| ZC3H6_MOUSE | Zinc finger CCCH domain-containing protein 6              | 0.65        |
| CHSS1_MOUSE | Chondroitin sulfate synthase 1                            | 0.64        |
| M11D1_MOUSE | Protein RSM22 homolog, mitochondrial                      | 0.65        |
| UB2D2_MOUSE | Ubiquitin-conjugating enzyme E2 D2                        | 0.66        |

(Continued)

| Prot_acc    | Prot_desc                                                               | Fold change |
|-------------|-------------------------------------------------------------------------|-------------|
| LIPB2_MOUSE | Liprin-beta-2                                                           | 0.66        |
| NUD15_MOUSE | Probable 7,8-dihydro-8-oxoguanine triphosphatase NUDT15                 | 0.66        |
| CAH3_MOUSE  | Carbonic anhydrase 3                                                    | 0.66        |
| CCNK_MOUSE  | Cyclin-K                                                                | 0.66        |
| VTDB_MOUSE  | Vitamin D-binding protein                                               | 0.66        |
| PRTN3_MOUSE | Myeloblastin                                                            | 1.50        |
| LIPT_MOUSE  | Lipoyltransferase 1, mitochondrial                                      | 1.51        |
| RGS19_MOUSE | Regulator of G-protein signaling 19                                     | 1.52        |
| PLCG1_MOUSE | Phosphatidylinositol bisphosphate phosphodiesterase                     | 1.52        |
| BL1S3_MOUSE | Biogenesis of lysosome-related organelles complex 1                     | 1.52        |
| MAST2_MOUSE | Microtubule-associated serine/threonine-protein kinase 2                | 1.52        |
| MTUS2_MOUSE | Microtubule-associated tumor suppressor candidate 2 homolog             | 1.53        |
| WIBG_MOUSE  | Partner of Y14 and mago                                                 | 1.53        |
| VMAC_MOUSE  | Vimentin-type intermediate filament-associated coiled-coil protein      | 1.53        |
| IFIX_MOUSE  | Pyrin and HIN domain-containing protein 1                               | 1.53        |
| SHPS1_MOUSE | Tyrosine-protein phosphatase non-receptor type substrate 1              | 1.54        |
| OGFD1_MOUSE | 2-oxoglutarate and iron-dependent oxygenase domain-containing protein 1 | 1.55        |
| RDH13_MOUSE | Retinol dehydrogenase 13                                                | 1.55        |
| ZFAN1_MOUSE | AN1-type zinc finger protein 1                                          | 1.56        |
| MED12_MOUSE | Mediator of RNA polymerase II transcription                             | 1.56        |
| RND3_MOUSE  | Rho-related GTP-binding protein RhoE                                    | 1.56        |
| SOX3_MOUSE  | Transcription factor SOX-3                                              | 1.56        |
| RM47_MOUSE  | 39S ribosomal protein L47, mitochondrial                                | 1.56        |
| PALD_MOUSE  | Paladin                                                                 | 1.57        |
| ORC3_MOUSE  | Origin recognition complex subunit 3                                    | 1.57        |
| UBXN6_MOUSE | UBX domain-containing protein 6                                         | 1.57        |
| RHBT3_MOUSE | Rho-related BTB domain-containing protein 3                             | 1.57        |
| CTCF_MOUSE  | Transcriptional repressor CTCF                                          | 1.57        |
| MXI1_MOUSE  | Max-interacting protein 1                                               | 1.58        |
| HSDL1_MOUSE | Inactive hydroxysteroid dehydrogenase-like protein 1                    | 1.58        |
| TRML1_MOUSE | Trem-like transcript 1 protein                                          | 1.58        |

(Continued)



| Prot_acc    | Prot_desc                                                       | Fold change |
|-------------|-----------------------------------------------------------------|-------------|
| TENN_MOUSE  | Tenascin-N                                                      | 1.59        |
| CADH2_MOUSE | Cadherin-2                                                      | 1.59        |
| CPNE7_MOUSE | Copine-7                                                        | 1.59        |
| K1109_MOUSE | Uncharacterized protein KIAA1109                                | 1.59        |
| CF125_MOUSE | Uncharacterized protein C6orf125 homolog                        | 1.60        |
| HAUS8_MOUSE | HAUS augmin-like complex subunit 8                              | 1.60        |
| PTTG_MOUSE  | Pituitary tumor-transforming gene 1 protein-interacting protein | 1.65        |
| MAGG1_MOUSE | Melanoma-associated antigen G1                                  | 1.66        |
| MTF2_MOUSE  | Metal-response element-binding transcription factor 2           | 1.67        |
| PIHD1_MOUSE | PIH1 domain-containing protein 1                                | 1.71        |
| THMS1_MOUSE | Protein THEMIS                                                  | 1.72        |
| SSRG_MOUSE  | Translocon-associated protein subunit gamma                     | 1.73        |
| TRI69_MOUSE | Tripartite motif-containing protein 69                          | 1.73        |
| LEG7_MOUSE  | Galectin-7                                                      | 1.73        |
| CEP70_MOUSE | Centrosomal protein of 70 kDa                                   | 1.73        |
| CLK1_MOUSE  | Dual specificity protein kinase CLK1                            | 1.73        |
| MIPT3_MOUSE | TRAF3-interacting protein 1                                     | 1.76        |
| SYCE1_MOUSE | Synaptonemal complex central element protein 1                  | 1.79        |
| MYADM_MOUSE | Myeloid-associated differentiation marker                       | 1.81        |
| PILRA_MOUSE | Paired immunoglobulin-like type 2 receptor                      | 1.84        |
| NSD2_MOUSE  | Probable histone-lysine N-methyltransferase                     | 1.86        |
| LIRB4_MOUSE | Leukocyte immunoglobulin-like receptor subfamily B member 4     | 1.87        |
| 7B2_MOUSE   | Neuroendocrine protein 7B2                                      | 1.90        |
| FBXW8_MOUSE | F-box/WD repeat-containing protein 8                            | 1.95        |
| GHRL_MOUSE  | Appetite-regulating hormone                                     | 2.00        |
| NDUA1_MOUSE | NADH dehydrogenase alpha subcomplex subunit 1                   | 2.07        |
| OSBL9_MOUSE | Oxysterol-binding protein-related protein 9                     | 2.17        |
| DSG2_MOUSE  | Desmoglein-2                                                    | 2.26        |
| ZNT4_MOUSE  | Zinc transporter 4                                              | 2.41        |
| PA24B_MOUSE | Cytosolic phospholipase A2 beta                                 | 2.67        |
| SUMF1_MOUSE | Sulfatase-modifying factor 1                                    | 2.71        |
| RPTOR_MOUSE | Regulatory-associated protein of mTOR                           | 2.86        |
| LRIQ3_MOUSE | Leucine-rich repeat and IQ domain-containing protein 3          | 4.99        |

**Supplementary Table S3: Differentially expressed mitochondrial proteins in the vehicle- and Rh2E2-treated LLC-1 lung cancer cells**

| Prot_acc    | Protein name                                                  | Fold change | Function                           |
|-------------|---------------------------------------------------------------|-------------|------------------------------------|
| ACADM_MOUSE | Medium-chain specific acyl-CoA dehydrogenase                  | 0.527       | fatty acid beta-oxidation          |
| ECHB_MOUSE  | Trifunctional enzyme subunit beta                             | 0.596       | fatty acid beta-oxidation          |
| ACADS_MOUSE | Short-chain specific acyl-CoA dehydrogenase                   | 0.594       | fatty acid beta-oxidation          |
| HCDH_MOUSE  | Hydroxyacyl-coenzyme A dehydrogenase                          | 0.473       | fatty acid beta-oxidation          |
| ECHM_MOUSE  | Enoyl-CoA hydratase                                           | 0.449       | fatty acid beta-oxidation          |
| ETFD_MOUSE  | Electron transfer flavoprotein-ubiquinone oxidoreductase      | 0.58        | links the oxidation of fatty acids |
| SUCB1_MOUSE | Succinyl-CoA ligase [ADP-forming] subunit beta                | 0.567       | tricarboxylic acid cycle           |
| DHSA_MOUSE  | Succinate dehydrogenase [ubiquinone] flavoprotein subunit     | 0.519       | tricarboxylic acid cycle           |
| ACON_MOUSE  | Aconitate hydratase                                           | 1.687       | tricarboxylic acid cycle           |
| FUMH_MOUSE  | Fumarate hydratase                                            | 0.62        | tricarboxylic acid cycle           |
| DHE3_MOUSE  | Glutamate dehydrogenase 1                                     | 1.716       | tricarboxylic acid cycle           |
| ODO1_MOUSE  | 2-oxoglutarate dehydrogenase                                  | 0.627       | tricarboxylic acid cycle           |
| PCKGM_MOUSE | Phosphoenolpyruvate carboxykinase [GTP]                       | 1.659       |                                    |
| GRP75_MOUSE | Stress-70 protein                                             | 0.469       | cell proliferation                 |
| RT07_MOUSE  | 28S ribosomal protein S7                                      | 0.211       | Ribosome biogenesis                |
| RT15_MOUSE  | 28S ribosomal protein S15                                     | 0.313       | Ribosome biogenesis                |
| RT22_MOUSE  | 28S ribosomal protein S22                                     | 0.674       | Ribosome biogenesis                |
| RT26_MOUSE  | 28S ribosomal protein S26                                     | 0.406       | Ribosome biogenesis                |
| RT35_MOUSE  | 28S ribosomal protein S35                                     | 0.51        | Ribosome biogenesis                |
| C1QBP_MOUSE | Complement component 1 Q subcomponent-binding protein         | 1.595       | Ribosome biogenesis                |
| QCR2_MOUSE  | Cytochrome b-c1 complex subunit 2                             | 0.613       | mitochondrial respiratory          |
| NDUV1_MOUSE | NADH dehydrogenase [ubiquinone] flavoprotein 1                | 0.548       | mitochondrial respiratory          |
| NDUS1_MOUSE | NADH-ubiquinone oxidoreductase 75 kDa subunit                 | 0.614       | mitochondrial respiratory          |
| CIA30_MOUSE | Complex I intermediate-associated protein 30                  | 0.631       | mitochondrial respiratory          |
| ATP5H_MOUSE | ATP synthase subunit d                                        | 0.546       | Hydrogen ion transport             |
| OAT_MOUSE   | Ornithine aminotransferase                                    | 0.354       | Amino-acid biosynthesis            |
| SCOT1_MOUSE | Succinyl-CoA:3-ketoacid-coenzyme A transferase 1              | 0.513       | Ketone metabolism                  |
| STML2_MOUSE | Stomatin-like protein 2                                       | 1.624       | Regulates mitochondrial function   |
| TIM13_MOUSE | Mitochondrial import inner membrane translocase subunit Tim13 | 2.494       | import of metabolite transporters  |

**Supplementary Table S4: Comparison of the differentially expressed proteins from the vehicle- and Rh2E2-treated LLC-1 lung cancer cells verse vehicle and Rh2E2-treated CCD19Lu normal lung fibroblasts**

| Protein name                                             | Fold Change |         |
|----------------------------------------------------------|-------------|---------|
|                                                          | LLC-1       | CCD19Lu |
| Medium-chain specific acyl-CoA dehydrogenase             | 0.527       | N/A     |
| Trifunctional enzyme subunit beta                        | 0.596       | N/A     |
| Short-chain specific acyl-CoA dehydrogenase              | 0.594       | N/A     |
| Hydroxyacyl-coenzyme A dehydrogenase                     | 0.473       | N/A     |
| Enoyl-CoA hydratase                                      | 0.449       | N/A     |
| Electron transfer flavoprotein-ubiquinone oxidoreductase | 0.58        | 0.949   |
| Succinyl-CoA ligase [ADP-forming] subunit beta           | 0.567       | 0.967   |
| Succinate dehydrogenase                                  | 0.519       | N/A     |
| Aconitate hydratase                                      | 1.687       | N/A     |
| Fumarate hydratase                                       | 0.62        | 0.962   |
| 2-oxoglutarate dehydrogenase                             | 0.627       | 0.996   |
| Stathmin                                                 | 0.65        | 1.378   |
| Alpha-enolase                                            | 0.60        | 0.942   |
